# Supplementary material for: Temporal and Spatial Availability of Cereal Straw in Germany - Case Study: Biomethane for the Transport Sector
Source: Research Square preprint supplement (doi:10.21203/rs.3.rs-16344/v3), 2020-10-21
Supplement: Supplementary file 1 [file a7575a0c25943d868423382e.docx]

1. – Basic data on animal grazing, husbandry and bedding requirements

| **Gp - Share of grazing** | Dairy cattle | Other cattle | Pigs | Sheep | Chicken | Goats | Horses | Turkeys | Ducks | Geese |
| --- | --- | --- | --- | --- | --- | --- | --- | --- | --- | --- |
| Schleswig-Holstein | 77% | 58% | 0% | 82% | 0% | 100% | 100% | 0% | 0% | 0% |
| Hamburg | 100% | 73% | 0% | 95% | 0% | 100% | 100% | 0% | 0% | 0% |
| Lower Saxony | 69% | 38% | 0% | 92% | 0% | 100% | 100% | 0% | 0% | 0% |
| Bremen | 0% | 77% | 0% | 50% | 0% | 100% | 100% | 0% | 0% | 0% |
| North Rhine-Westphalia | 82% | 35% | 0% | 87% | 0% | 100% | 100% | 0% | 0% | 0% |
| Hesse | 48% | 51% | 0% | 86% | 0% | 100% | 100% | 0% | 0% | 0% |
| Rhineland-Palatinate | 62% | 52% | 0% | 90% | 0% | 100% | 100% | 0% | 0% | 0% |
| Baden-Wuerttemberg | 28% | 27% | 0% | 89% | 0% | 100% | 100% | 0% | 0% | 0% |
| Bavaria | 16% | 13% | 0% | 81% | 0% | 100% | 100% | 0% | 0% | 0% |
| Saarland | 67% | 57% | 0% | 93% | 0% | 100% | 100% | 0% | 0% | 0% |
| Berlin | 0% | 75% | 0% | 25% | 0% | 100% | 100% | 0% | 0% | 0% |
| Brandenburg | 15% | 53% | 0% | 83% | 0% | 100% | 100% | 0% | 0% | 0% |
| Mecklenburg-Western Pomerania | 34% | 52% | 0% | 81% | 0% | 100% | 100% | 0% | 0% | 0% |
| Saxony | 15% | 40% | 0% | 78% | 0% | 100% | 100% | 0% | 0% | 0% |
| Saxony-Anhalt | 17% | 39% | 0% | 79% | 0% | 100% | 100% | 0% | 0% | 0% |
| Thuringia | 13% | 44% | 0% | 82% | 0% | 100% | 100% | 0% | 0% | 0% |
| Germany | 42% | 35% | 0% | 84% | 0% | 100% | 100% | 0% | 0% | 0% |
| **Gd - Duration of grazing period per year** | Dairy cattle | Other cattle | Pigs | Sheep | Chicken | Goats | Horses | Turkeys | Ducks | Geese |
| Schleswig-Holstein | 46% | 54% | 0% | 87% | 0% | 90% | 0% | 0% | 0% | 0% |
| Hamburg | 52% | 62% | 0% | 77% | 0% | 90% | 0% | 0% | 0% | 0% |
| Lower Saxony | 46% | 52% | 0% | 75% | 0% | 90% | 0% | 0% | 0% | 0% |
| Bremen | 48% | 54% | 0% | 73% | 0% | 90% | 0% | 0% | 0% | 0% |
| North Rhine-Westphalia | 50% | 52% | 0% | 79% | 0% | 90% | 0% | 0% | 0% | 0% |
| Hesse | 46% | 54% | 0% | 73% | 0% | 90% | 0% | 0% | 0% | 0% |
| Rhineland-Palatinate | 46% | 54% | 0% | 81% | 0% | 90% | 0% | 0% | 0% | 0% |
| Baden-Wuerttemberg | 44% | 50% | 0% | 73% | 0% | 90% | 0% | 0% | 0% | 0% |
| Bavaria | 40% | 46% | 0% | 67% | 0% | 90% | 0% | 0% | 0% | 0% |
| Saarland | 50% | 56% | 0% | 79% | 0% | 90% | 0% | 0% | 0% | 0% |
| Berlin | 0% | 0% | 0% | 0% | 0% | 90% | 0% | 0% | 0% | 0% |
| Brandenburg | 50% | 75% | 0% | 81% | 0% | 90% | 0% | 0% | 0% | 0% |
| Mecklenburg-Western Pomerania | 48% | 65% | 0% | 83% | 0% | 90% | 0% | 0% | 0% | 0% |
| Saxony | 46% | 56% | 0% | 65% | 0% | 90% | 0% | 0% | 0% | 0% |
| Saxony-Anhalt | 48% | 63% | 0% | 77% | 0% | 90% | 0% | 0% | 0% | 0% |
| Thuringia | 48% | 60% | 0% | 65% | 0% | 90% | 0% | 0% | 0% | 0% |
| Germany | 46% | 54% | 0% | 73% | 0% | 90% | 0% | 0% | 0% | 0% |
| **Hsm - Straw based housing** | Dairy cattle | Other cattle | Pigs | Sheep | Chicken | Goats | Horses | Turkeys | Ducks | Geese |
| Schleswig-Holstein | 12% | 40% | 3% | 100% | 93% | 100% | 100% | 100% | 100% | 100% |
| Hamburg | 17% | 30% | 12% | 100% | 42% | 100% | 100% | 100% | 100% | 100% |
| Lower Saxony | 14% | 34% | 4% | 100% | 89% | 100% | 100% | 100% | 100% | 100% |
| Bremen | 10% | 0% | 0% | 100% | 0% | 100% | 100% | 100% | 100% | 100% |
| North Rhine-Westphalia | 23% | 41% | 6% | 100% | 87% | 100% | 100% | 100% | 100% | 100% |
| Hesse | 30% | 0% | 23% | 100% | 82% | 100% | 100% | 100% | 100% | 100% |
| Rhineland-Palatinate | 22% | 60% | 21% | 100% | 94% | 100% | 100% | 100% | 100% | 100% |
| Baden-Wuerttemberg | 19% | 50% | 16% | 100% | 94% | 100% | 100% | 100% | 100% | 100% |
| Bavaria | 14% | 32% | 13% | 100% | 85% | 100% | 100% | 100% | 100% | 100% |
| Saarland | 28% | 65% | 32% | 100% | 76% | 100% | 100% | 100% | 100% | 100% |
| Berlin | 0% | 0% | 100% | 100% | 100% | 100% | 100% | 100% | 100% | 100% |
| Brandenburg | 36% | 81% | 9% | 100% | 93% | 100% | 100% | 100% | 100% | 100% |
| Mecklenburg-Western Pomerania | 24% | 74% | 7% | 100% | 100% | 100% | 100% | 100% | 100% | 100% |
| Saxony | 23% | 69% | 8% | 100% | 97% | 100% | 100% | 100% | 100% | 100% |
| Saxony-Anhalt | 31% | 80% | 6% | 100% | 83% | 100% | 100% | 100% | 100% | 100% |
| Thuringia | 27% | 69% | 8% | 100% | 99% | 100% | 100% | 100% | 100% | 100% |
| Germany | 19% | 41% | 8% | 100% | 94% | 100% | 100% | 100% | 100% | 100% |
| **Ba - Bedding-requirement** | Dairy cattle | Other cattle | Pigs | Sheep | Chicken | Goats | Horses | Turkeys | Ducks | Geese |
| **Base data from literature** | | | | | | | | | | |
| **Maximum per animal** | 6 | 1 | 1.50 | 0.6 | 1,220 | 0.6 | 6 | 7 | 2 | 11.2 |
| Unit | kg fm (AP d)-1 | kg fm (AP d)-1 | kg fm (AP d)-1 | kg fm (AP d)-1 | kg fm (1,000 AP a) -1 | kg fm (A d)-1 | kg fm (A d)-1 | kg fm (A cy)-1 | kg fm (A a)-1 | kg fm (A a)-1 |
| Remarks | fm: fresh matter; AP: animal place; d: day, a: year; A: animal, cy: cycle | | | | | | | | | |
| **Stable days** | | | | | | | | | | |
| Schleswig-Holstein | 197 | 168 | 365 | 49 | 365 | 37 | 365 | 365 | 365 | 365 |
| Hamburg | 175 | 140 | 365 | 84 | 365 | 37 | 365 | 365 | 365 | 365 |
| Lower Saxony | 197 | 175 | 365 | 91 | 365 | 37 | 365 | 365 | 365 | 365 |
| Bremen | 190 | 168 | 365 | 98 | 365 | 37 | 365 | 365 | 365 | 365 |
| North Rhine-Westphalia | 183 | 175 | 365 | 77 | 365 | 37 | 365 | 365 | 365 | 365 |
| Hesse | 197 | 168 | 365 | 98 | 365 | 37 | 365 | 365 | 365 | 365 |
| Rhineland-Palatinate | 197 | 168 | 365 | 70 | 365 | 37 | 365 | 365 | 365 | 365 |
| Baden-Wuerttemberg | 204 | 183 | 365 | 98 | 365 | 37 | 365 | 365 | 365 | 365 |
| Bavaria | 218 | 197 | 365 | 119 | 365 | 37 | 365 | 365 | 365 | 365 |
| Saarland | 183 | 161 | 365 | 77 | 365 | 37 | 365 | 365 | 365 | 365 |
| Berlin | 365 | 365 | 365 | 365 | 365 | 37 | 365 | 365 | 365 | 365 |
| Brandenburg | 183 | 91 | 365 | 70 | 365 | 37 | 365 | 365 | 365 | 365 |
| Mecklenburg-Western Pomerania | 190 | 126 | 365 | 63 | 365 | 37 | 365 | 365 | 365 | 365 |
| Saxony | 197 | 161 | 365 | 126 | 365 | 37 | 365 | 365 | 365 | 365 |
| Saxony-Anhalt | 190 | 133 | 365 | 84 | 365 | 37 | 365 | 365 | 365 | 365 |
| Thuringia | 190 | 147 | 365 | 126 | 365 | 37 | 365 | 365 | 365 | 365 |
| Germany | 197 | 168 | 365 | 98 | 365 | 37 | 365 | 365 | 365 | 365 |
| **Mg fm a-1 (including stable days)** | | | | | | | | | | |
| Schleswig-Holstein | 1.182 | 0.168 | 0.548 | 0.029 | 0.001 | 0.022 | 2.190 | 0.017 | 0.002 | 0.011 |
| Hamburg | 1.050 | 0.140 | 0.548 | 0.050 | 0.001 | 0.022 | 2.190 | 0.017 | 0.002 | 0.011 |
| Lower Saxony | 1.182 | 0.175 | 0.548 | 0.055 | 0.001 | 0.022 | 2.190 | 0.017 | 0.002 | 0.011 |
| Bremen | 1.140 | 0.168 | 0.548 | 0.059 | 0.001 | 0.022 | 2.190 | 0.017 | 0.002 | 0.011 |
| North Rhine-Westphalia | 1.098 | 0.175 | 0.548 | 0.046 | 0.001 | 0.022 | 2.190 | 0.017 | 0.002 | 0.011 |
| Hesse | 1.182 | 0.168 | 0.548 | 0.059 | 0.001 | 0.022 | 2.190 | 0.017 | 0.002 | 0.011 |
| Rhineland-Palatinate | 1.182 | 0.168 | 0.548 | 0.042 | 0.001 | 0.022 | 2.190 | 0.017 | 0.002 | 0.011 |
| Baden-Wuerttemberg | 1.224 | 0.183 | 0.548 | 0.059 | 0.001 | 0.022 | 2.190 | 0.017 | 0.002 | 0.011 |
| Bavaria | 1.308 | 0.197 | 0.548 | 0.071 | 0.001 | 0.022 | 2.190 | 0.017 | 0.002 | 0.011 |
| Saarland | 1.098 | 0.161 | 0.548 | 0.046 | 0.001 | 0.022 | 2.190 | 0.017 | 0.002 | 0.011 |
| Berlin | 2.190 | 0.365 | 0.548 | 0.219 | 0.001 | 0.022 | 2.190 | 0.017 | 0.002 | 0.011 |
| Brandenburg | 1.098 | 0.091 | 0.548 | 0.042 | 0.001 | 0.022 | 2.190 | 0.017 | 0.002 | 0.011 |
| Mecklenburg-Western Pomerania | 1.140 | 0.126 | 0.548 | 0.038 | 0.001 | 0.022 | 2.190 | 0.017 | 0.002 | 0.011 |
| Saxony | 1.182 | 0.161 | 0.548 | 0.076 | 0.001 | 0.022 | 2.190 | 0.017 | 0.002 | 0.011 |
| Saxony-Anhalt | 1.140 | 0.133 | 0.548 | 0.050 | 0.001 | 0.022 | 2.190 | 0.017 | 0.002 | 0.011 |
| Thuringia | 1.140 | 0.147 | 0.548 | 0.076 | 0.001 | 0.022 | 2.190 | 0.017 | 0.002 | 0.011 |
| Germany | 1.182 | 0.168 | 0.548 | 0.059 | 0.001 | 0.022 | 2.190 | 0.017 | 0.002 | 0.011 |
